# Supplementary material for: Screening for type 2 diabetes: do screen-detected cases fare better?
Source: Springer Nature journal article supplement (doi:10.1007/s00125-017-4402-4), 2017-08-21
Supplement: MOESM1 [file 14232626]

Electronic Supplementary Material (ESM) to

“Screening for type 2 diabetes: do screen-detected cases fare better?”

By Feldman AL, *et al.*

| <b>ESM Table 1.</b> International Classification of Diseases (ICD) codes used to identify health outcome events in the Swedish Cause of Death and National Patient Register (including inpatient and outpatient hospital records). |                                    |                                         |                                                     |                                                                     |
|------------------------------------------------------------------------------------------------------------------------------------------------------------------------------------------------------------------------------------|------------------------------------|-----------------------------------------|-----------------------------------------------------|---------------------------------------------------------------------|
| <b>Type of event</b>                                                                                                                                                                                                               |                                    | <b>ICD-9</b>                            | <b>ICD-10</b>                                       | <b>Description</b>                                                  |
| <b>Cardiovascular disease (CVD)</b>                                                                                                                                                                                                | <b>Myocardial infarction</b>       | 410                                     | I21                                                 | Acute myocardial infarction                                         |
|                                                                                                                                                                                                                                    |                                    |                                         | I22                                                 | Subsequent myocardial infarction                                    |
|                                                                                                                                                                                                                                    |                                    |                                         | I23                                                 | Certain current complications following acute myocardial infarction |
|                                                                                                                                                                                                                                    |                                    | 411                                     | I24                                                 | Other acute (and subacute) forms of ischemic heart disease          |
|                                                                                                                                                                                                                                    | <b>Heart failure</b>               | 428                                     | I50                                                 | Heart failure                                                       |
|                                                                                                                                                                                                                                    |                                    | 402A/01                                 | I11.0                                               | Hypertensive heart disease with (congestive) heart failure          |
|                                                                                                                                                                                                                                    | <b>Stroke</b>                      | 430                                     | I60                                                 | Subarachnoid haemorrhage                                            |
|                                                                                                                                                                                                                                    |                                    | 431                                     | I61                                                 | Intracerebral haemorrhage                                           |
|                                                                                                                                                                                                                                    |                                    | 432                                     | I62                                                 | Other and unspecified intracranial haemorrhage                      |
|                                                                                                                                                                                                                                    |                                    |                                         | I63                                                 | Cerebral infarction                                                 |
|                                                                                                                                                                                                                                    |                                    |                                         | I64                                                 | Stroke, not specified as haemorrhage or infarction                  |
|                                                                                                                                                                                                                                    |                                    | 433                                     | I65                                                 | Occlusion (and stenosis) of precerebral arteries                    |
|                                                                                                                                                                                                                                    | <b>Peripheral arterial disease</b> | 434                                     | I66                                                 | Occlusion (and stenosis) of cerebral arteries                       |
|                                                                                                                                                                                                                                    |                                    | 250G/7                                  | E11.5<br>E13.5<br>E14.5                             | Diabetes with peripheral circulatory disorders                      |
|                                                                                                                                                                                                                                    |                                    | 440C/2                                  | I70.2                                               | Atherosclerosis of arteries of extremities                          |
|                                                                                                                                                                                                                                    |                                    | 443X/9                                  | I73.9                                               | Peripheral vascular disease, unspecified                            |
|                                                                                                                                                                                                                                    | <b>Renal disease</b>               | 443W/8                                  | I79.2                                               | Peripheral angiopathy in diseases classified elsewhere              |
| 403A/01                                                                                                                                                                                                                            |                                    | I12.0                                   | Hypertensive renal disease with renal failure       |                                                                     |
| 404                                                                                                                                                                                                                                |                                    | I13                                     | Hypertensive heart and renal disease                |                                                                     |
| 584                                                                                                                                                                                                                                |                                    | N17                                     | Acute renal failure                                 |                                                                     |
| 585                                                                                                                                                                                                                                |                                    | N18                                     | Chronic kidney disease (CKD)                        |                                                                     |
| 586                                                                                                                                                                                                                                |                                    | N19                                     | Renal failure, unspecified                          |                                                                     |
| <b>Retinopathy</b>                                                                                                                                                                                                                 | 250D/4                             | E11.2<br>E13.2<br>E14.2                 | Diabetes with renal manifestations                  |                                                                     |
|                                                                                                                                                                                                                                    | 362D/3                             | H34                                     | Retinal vascular occlusions                         |                                                                     |
|                                                                                                                                                                                                                                    | 362B/1                             | H35.0                                   | Background retinopathy and retinal vascular changes |                                                                     |
|                                                                                                                                                                                                                                    | 362G/6                             | H35.4                                   | Peripheral retinal degeneration                     |                                                                     |
|                                                                                                                                                                                                                                    | 362W/8                             | H35.6                                   | Retinal haemorrhage                                 |                                                                     |
|                                                                                                                                                                                                                                    | 362X/9                             | H35.9                                   | Retinal disorder, unspecified                       |                                                                     |
|                                                                                                                                                                                                                                    | 362A/0                             | H36.0                                   | Diabetic retinopathy                                |                                                                     |
| 250E/5                                                                                                                                                                                                                             | E11.3<br>E13.3<br>E14.3            | Diabetes with ophthalmic manifestations |                                                     |                                                                     |

Electronic Supplementary Material (ESM) to  
 “Screening for type 2 diabetes: do screen-detected cases fare better?”  
 By Feldman AL, *et al.*

**ESM table 2.** Sensitivity analyses among screening participants only: Associations between mode of detection of diabetes and death, incident CVD events, renal complications, or retinal complications. Västerbotten Intervention Programme 1992-2013.

|                                                                                                                                             | All-cause mortality |            | CVD events |            | Renal Disease |            | Retinopathy |            |
|---------------------------------------------------------------------------------------------------------------------------------------------|---------------------|------------|------------|------------|---------------|------------|-------------|------------|
|                                                                                                                                             | HR                  | 95% CI     | HR         | 95% CI     | HR            | 95% CI     | HR          | 95% CI     |
| Main analysis adjusted for prior CVD event status                                                                                           | 1.65                | 1.28, 2.12 | 1.16       | 0.95, 1.41 | 1.83          | 1.30, 2.58 | 1.39        | 1.07, 1.82 |
| Main analysis adjusted for prior CVD event status, time between previous screening and detection, biomarkers measured at previous screening | 1.42                | 1.05, 1.92 | 1.01       | 0.79, 1.28 | 1.51          | 1.00, 2.29 | 1.07        | 0.77, 1.49 |

HRs are for incident clinically detected individuals with diabetes who were screening participants vs. screen-detected individuals (reference).

HRs adjusted for calendar time in time-scale and the co-variables age at diabetes detection, calendar year of diabetes detection, sex, and socioeconomic status reported in the 1990 census in addition to variables specified above. Biomarkers at previous screening were BMI, systolic and diastolic blood pressure, total serum cholesterol and self-reported overall bad health.

Socioeconomic status imputed for n=1,565 individuals who had missing information.

CI: Confidence interval, CVD: Cardiovascular disease, HR: Hazard ratio, OGTT: Oral glucose tolerance test.
